# Supplementary material for: Thyroid Profile in the First Three Months after Starting Treatment in Children with Newly Diagnosed Cancer
Source: MDPI journal article supplement (doi:10.3390/cancers15051500), 2023-02-27
Supplement: s1 [file s1]

## Supplementary File S2. Chemotherapeutic Agents and Corticosteroids

### A. Overview of groups of chemotherapeutic agents and corticosteroids administered in children three months after diagnosis.

| Chemotherapy groups       | Three months after diagnosis |           |
|---------------------------|------------------------------|-----------|
|                           | N=276                        |           |
|                           | Total                        | <7 days   |
|                           | N (%)                        | N (%)     |
| Alkylating agents         | 216 (79)                     | 16 (5.8)  |
| Antimetabolites           | 192 (70)                     | 34 (12)   |
| Anthracycline antibiotics | 197 (71)                     | 3 (1.1)   |
| Asparaginase              | 128 (46)                     | 19 (6.9)  |
| Oncolytica                | 4 (1.4)                      | 2 (0.7)   |
| Protein kinase inhibitors | 8 (2.9)                      | 7 (2.5)   |
| Topo-isomerase inhibitors | 86 (31)                      | 1 (0.4)   |
| Vinca-alkaloids           | 235 (85)                     | 18 (6.5)  |
| <b>Corticosteroids</b>    | Total                        | <48 hours |
|                           | N (%)                        | N (%)     |
| Treatment protocol        | 243 (89)                     | 2 (0.7)   |
| Other <sup>^</sup>        | 5 (1.8)                      | 20 (7.2)  |

Chemotherapeutic agents or corticosteroids administered three months after diagnosis.

<sup>^</sup>Including corticosteroids used as supportive care drugs e.g. as anti-emetic drugs.

### B. Group Classification of Chemotherapeutic Agents and Corticosteroids

**Alkylating agents:** Cyclofosfamide, Dacarbazine, Ifosfamide, Lomustine, Thiotepa, Busulfan, Temozolomide, Melfalan, Bendamustine, Carmustine, Treosulfan

**Antimetabolites:** Cytarabine, Fludarabine, Fluorouracil, Mercaptopurine, Methotrexate, Tioguanine, Azacitidine, Clofarabine, Gemcitabine, Nelarabine 5 mg/ml

**Anthracycline antibiotics:** Bleomycine, Dactinomycine, Daunorubicine, Doxorubicine, Mitoxantrone, Daunorubicin+Cytarabine, Daunorubicine, Idarubicine

**Asparaginase:** Pegasparaginase (Oncaspar), Spectrila, Erwinase, Asparaginase, E.Coli (Spectrila) Asparaginase, Erwinia (Crisantaspase)

**Oncolytica:** Arseentrioxide

**Protein kinase inhibitor:** Bortezomib, Imatinib, Quizartinib, Brigatinib, Dasatinib, Ruxolitinib, Ponatinib, Crizotinib

**Topo-isomerase inhibitor:** Etoposide, Irinotecan, Topotecan

**Vinca-alkaloids:** Vinblastine, Vincristine, Vindesine, Vinorelbine

**Corticosteroids:** Dexamethason, Methylprednisolon, Prednisolon, Hydrocortison
