# Supplementary material for: Thyroid Profile in the First Three Months after Starting Treatment in Children with Newly Diagnosed Cancer
Source: MDPI journal article supplement (doi:10.3390/cancers15051500), 2023-02-27
Supplement: s1 [file s1]

## **Supplementary Files**

### **Supplementary File S1. Laboratory assays**

FT4 and TSH concentrations were measured using the Atellica IM analyzer ®, (Siemens Healthcare Diagnostics Inc., Erlangen, Germany). Serum reverse T3 was measured using an Enzyme-Linked Immunosorbent Assay (ELISA) kit (TECAN IBL International, Hamburg, Germany). For determination of antibodies against thyroid peroxidase (anti-TPO) the 'Phadia250' immunoassay analyzer was used (Thermo Fisher Scientific Inc., Waltham, United States).
